# Supplementary material for: Subjective Responses to Alcohol in the Development and Maintenance of Alcohol Use Disorder
Source: Atypon-hosted journal article supplement (doi:10.1176/appi.ajp.2020.20030247), 2021-01-05
Supplement: appi.ajp.2020.20030247.ds001.pdf [file appi.ajp.2020.20030247.ds001.pdf]

 


Psychiatry Online
